# Supplementary material for: Combination of a 15-SNP Polygenic Risk Score and Classical Risk Factors for the Prediction of Breast Cancer Risk in Cypriot Women
Source: Cancers (Basel). 2021 Sep 11;13(18):4568. doi: 10.3390/cancers13184568 (PMC8468424; doi:10.3390/cancers13184568)
Supplement: Supplementary file 1 [file cancers-13-04568-s001.zip › cancers-1346105-Tables.xlsx]

## Sheet: Table S1
Table S1: Phenotypic characteristics in the MASTOS study. Frequencies of categorical variables and mean and standard deviation (SD) of continuous variables were calculated separately in cas-es and controls. Associations between each risk factor and breast cancer risk in the MASTOS study were calculated using univariable logistic regression analysis
Risk Factor	Controls n=1174 (%)	Cases n=1109 (%)	OR (95% CI)	P-value	AUC	GOF P-value
Age at Interview for both cases and controls
MEAN(SD)	55.65 (7.04)	55.99 (9.15)	1.01 (0.99-1.02)	0.32	0.508	< 2.2e-16
Median (range)	55.50 (28-72)	56 (32-82)
IQR*	10	14
<45	69 (5.9)	132 (11.9)	2.40 (1.74 -3.33)	1.13e-07	0.58	1
45-54 (REF)	440 (37.5)	351 (31.7)	1	REF
55-64	525 (44.7)	394 (35.5)	0.94 (0.78-1.14)	0.53
>=65	140 (11.9)	232 (20.9)	2.08 (1.62-2.68)	1.36e-08
Age at Menarche
MEAN (SD)	13.18 (1.55)	12.98 (1.48)	0.92 (0.87-0.97)	0.0017	0.532	0.95
Median (range)	13 (9-20)	13 (9-18)
IQR	2	2
<=11	127 (10.8)	154 (13.9)	1.27 (0.99-1.65)	0.06	0.528	1
12.0-14 (REF)	838 (71.4)	797 (71.9)	1	REF
>=15	205 (17.5)	155 (14.0)	0.79 (0.63-1.00)	0.051
Missing	4 (0.3)	3 (0.3)
Menopausal Status
Pre-meno(REF)	357 (30.4)	174 (15.7)	1	REF	0.574	1
Post-meno	817 (69.6)	935 (84.3)	2.35 (1.92-2.88)	2.45e-16
Ever Parous
No (REF)	65 (5.5)	88 (7.9)	1	REF	0.512	1
Yes	1109 (94.5)	1021 (92.1)	0.68 (0.49-0.95)	0.02
Age at first full term pregnancy
<20 (REF)	145 (12.4)	106 (9.6)	1	REF	0.545	1
20-25	538 (45.8)	460 (41.5)	1.17 (0.89-1.55)	0.27
25-30	288 (24.5)	285 (25.7)	1.35 (1.00-1.83)	0.047
30-35	69 (5.9)	90 (8.1)	1.78 (1.20-2.67)	0.005
>=35	46 (3.9)	50 (4.5)	1.49 (0.93-2.39)	0.1
Nulliparous	65 (5.5)	88 (7.9)	1.85 (1.24-2.79)	0.003
Missing	23 (2.0)	30 (2.7)
Age at FFTP among parous women			1.03 (1.01-1.05)	0.0009	0.544	0.69
Breast feeding among parous women
No	280 (25.2)	305 (29.9)	1	REF	0.523	1
Yes	829 (74.8)	716 (70.1)	0.79 (0.66-0.96)	0.017
Height (cm)
Mean (SD)	159.6 (6.27)	159.7 (6.48)	1.00 (0.99-1.02)	0.757	0.5049	0.026
Median (range)	160 (140-180)	160 (140-185)
IQR	10	10
Missing	101 (8.6)	70 (6.3)
BMI (kg/m2)
MEAN(SD)	27.1 (4.69)	27.65 (5.5)	1.02 (1.004-1.04)	0.015	0.522	0.0026
Median (range)	27 (17-47)	27 (17-52)
IQR	6	7
Missing	109	77
<18.5	11 (0.9)	13 (1.2)	1.20 (0.53-2.78)	0.66	0.5497	1
18.5-25 (REF)	318 (27.1)	312 (28.1)	1	REF
25-30	465 (39.6)	370 (33.4)	0.81 (0.66-1.00)	0.048
>=30	271 (23.1)	337 (30.4)	1.27 (1.01-1.59)	0.038
Missing	109 (9.3)	77 (6.9)
Ever use of HRT among postmenopausal women
No (REF)	572 (70.0)	794 (84.9)	1	REF	0.575	1
Yes	238 (29.1)	133 (14.2)	0.40 (0.32-0.51)	6.52e-14
Missing	7 (0.9)	8 (0.9)
Ever smoking
No (REF)	955 (81.3)	869 (78.4)	1	REF	0.514	1
Yes	219 (18.7)	238 (21.5)	1.19 (0.97-1.47)	0.09
Missing	0	2 (0.2)
Family History
No (REF)	1078 (91.8)	919 (82.9)	1	REF	0.544	1
Yes	95 (8.1)	188 (17.0)	2.32 (1.79-3.03)	2.95e-10
Missing	1 (0.1)	2 (0.2)
*IQR: Interquartile range

## Sheet: Table S2
Table S2A: Odds ratio (95% CI) by quartiles of PRS15 risk distribution generated using the 2nd quartile (25-50%) as the reference
Percentile Categories	Description	Controls (%)	Cases (%)	OR (95% CI)	P-value
1	0-25%	257 (21.9)	206 (18.6)	0.98 (0.76-1.27)	0.88
2	25-50% (REF)	257 (21.9)	210 (18.9)	1	REF
3	50-75%	257 (21.9)	248 (22.4)	1.18 (0.92-1.52)	0.2
4	75-100%	257 (21.9)	318 (28.7)	1.51 (1.19-1.94)	0.0009
	Missings	146 (12.4)	127 (11.5)
Table S2B: PRS15 adjusted by family history and age
Models	OR (95% CI)	P-value	AUC	GOF p-value
PRS15
	1.66 (1.25-2.19)	0.0004	0.547 (0.52-0.57)	0.162
PRS15 + Age
PRS15	1.66 (1.25-2.20)	0.0004	0.548	0.26
Age Interview	1.00 (0.99-1.02)	0.37
PRS15 + Family History
PRS15	1.56 (1.18-2.08)	0.002	0.578	0.18
Family History	2.38 (1.80-3.18)	2.31e-09
PRS15 + Family History + PRS15*Family History
PRS15	1.52 (1.13-2.06)	0.006	0.578	0.2
Family History	2.04 (1.06-3.95)	0.03
PRS15*Family History	1.26 (0.52-3.16)	0.61
PRS15 + Age + Family History
PRS15	1.57 (1.18-2.08)	0.002	0.578	0.23
Age Interview	1.00 (0.99-1.01)	0.66
Family History	2.37 (1.79-3.17)	2.96e-09

## Sheet:  Table S3
Table S3A: Table of Spearman Pairwise Correlation r between risk variables in the MASTOS study
Risk Factor	Age Interview	Age at Menarche	Menopausal Status	Parous	AgeFFTP	Breastfeeding	Height	BMI	HRT ever use	Smoking Status	Family History	PRS15
Age Interview	1	0.109045	0.662184	-0.01006	-0.0378834	0.051985	-0.26876	0.239799	0.0395157	-0.151575	0.0364127	0.015392
Age at Menarche	0.109045	1	0.0570816	0.00678365	0.0288202	0.0619605	0.027191	-0.0660559	-0.00860721	-0.0982497	0.00837631	0.0419612
Menopausal Status	0.662184	0.0570816	1	-0.00620001	-0.0488613	-0.0118308	-0.181611	0.143351	0.189751	-0.05421	0.0129919	0.0238827
Parous	-0.01006	0.00678365	-0.00620001	1	-0.426262	0.375283	0.066613	-0.0194712	0.0123071	-0.0657327	-0.051024	0.00222084
AgeFFTP	-0.0378834	0.0288202	-0.0488613	-0.426262	1	-0.238963	-0.0629505	-0.0604483	-0.0180572	0.057541	0.0135529	0.0158372
Breastfeeding	0.051985	0.0619605	-0.0118308	0.375283	-0.238963	1	-0.0485919	0.0397697	-0.0530563	-0.103891	-0.0627347	-0.0414555
Height	-0.26876	0.027191	-0.181611	0.066613	-0.0629505	-0.0485919	1	-0.186039	0.0713913	0.0807333	-0.0152592	-0.0247224
BMI	0.239799	-0.0660559	0.143351	-0.0194712	-0.0604483	0.0397697	-0.186039	1	-0.0334761	-0.14826	-0.00675583	-0.00746724
HRT ever use	0.0395157	-0.00860721	0.189751	0.0123071	-0.0180572	-0.0530563	0.0713913	-0.0334761	1	0.0662453	0.0249271	0.0254143
Smoking Status	-0.151575	-0.0982497	-0.05421	-0.0657327	0.057541	-0.103891	0.0807333	-0.14826	0.0662453	1	-0.0213332	-0.00661644
Family History	0.0364127	0.00837631	0.0129919	-0.051024	0.0135529	-0.0627347	-0.0152592	-0.00675583	0.0249271	-0.0213332	1	0.0341107
PRS15	0.015392	0.0419612	0.0238827	0.00222084	0.0158372	-0.0414555	-0.0247224	-0.00746724	0.0254143	-0.00661644	0.0341107	1
Table S3B: Table of Spearman Pairwise Correlation p-value between risk variables in the MASTOS study
Column1	Age Interview	Age at Menarche	Menopausal Status	Parous	AgeFFTP	Breastfeeding	Height	BMI	HRT ever use	Smoking Status	Family History	PRS15
Age Interview	NA	0.000186177	0	0.730595	0.199033	0.0749934	0	2.22045e-15	0.178648	1.80722e-07	0.212696	0.622059
Age at Menarche	0.000186177	NA	0.0509389	0.8167	0.329459	0.0340782	0.373789	0.0312011	0.770031	0.000764859	0.774809	0.179478
Menopausal Status	0	0.0509389	NA	0.831943	0.0975446	0.685516	2.0734e-09	2.64057e-06	7.26894e-11	0.0633367	0.656678	0.444322
Parous	0.730595	0.8167	0.831943	NA	0	0	0.0291169	0.525596	0.675414	0.0243046	0.0806719	0.943303
AgeFFTP	0.199033	0.329459	0.0975446	0	NA	2.22045e-16	0.041311	0.0509793	0.54266	0.0509793	0.646145	0.615511
Breastfeeding	0.0749934	0.0340782	0.685516	0	2.22045e-16	NA	0.111656	0.194684	0.0708627	0.000363106	0.0316795	0.184139
Height	0	0.373789	2.0734e-09	0.0291169	0.041311	0.111656	NA	9.49889e-10	0.0201546	0.00815001	0.617742	0.449001
BMI	2.22045e-15	0.0312011	2.64057e-06	0.525596	0.0509793	0.194684	9.49889e-10	NA	0.278241	1.17644e-06	0.825784	0.819719
HRT ever use	0.178648	0.770031	7.26894e-11	0.675414	0.54266	0.0708627	0.0201546	0.278241	NA	0.024053	0.396528	0.418856
Smoking Status	1.80722e-07	0.000764859	0.0633367	0.0243046	0.0509793	0.000363106	0.00815001	1.17644e-06	0.024053	NA	0.465422	0.832198
Family History	0.212696	0.774809	0.656678	0.0806719	0.646145	0.0316795	0.617742	0.825784	0.396528	0.465422	NA	0.274778
PRS15	0.622059	0.179478	0.444322	0.943303	0.615511	0.184139	0.449001	0.819719	0.418856	0.832198	0.274778	NA

## Sheet: Table S4
Table S4: Associations between the risk factors of the final integrated risk model with breast cancer risk in Cypriot women. OR (95% CI) of each risk factor for breast cancer risk were calculated using multivariable logistic regression analysis.
Risk Factors	OR (95% CI)	P-value	AUC	GOF
Age at Interview	0.97 (0.95-0.98)	7.61e-05	0.6975 (0.673-0.722)	p-value=0.365
Menopausal Status	4.35 (3.24-5.87)	< 2e-16		x2=8.73
Age at Menarche	0.92 (0.86-0.98)	0.015
Age FFTP 1*	1.19 (0.86-1.67)	0.29
Age FFTP 2	1.6 (1.12-2.29)	0.0098
Age FFTP 3	2 (1.23-3.29)	0.0057
Age FFTP 4	1.58 (0.89-2.8)	0.12
Parous	0.7 (0.42-1.17)	0.18
Breastfeeding	0.87 (0.68-1.11)	0.26
Smoking Status	1.18 (0.92-1.52)	0.2
BMI	1.02 (1-1.04)	0.08
Height	1.02 (1-1.03)	0.065
HRT ever use	0.34 (0.26-0.45)	1.07e-14
Family History	2.45 (1.78-3.39)	4.34e-08
PRS15	1.55 (1.12-2.13)	0.007
*Age FFTP: age at first full term pregnancy ; Age FFTP category 5 (Nulliparous) was included in the category 0 of Age FFTP (reference).
**The model was adjusted by age and menopausal status
